# Supplementary material for: A Synthetic Kinome Microarray Data Generator
Source: PubMed Central journal article supplement (PMC4996406; doi:10.3390/microarrays4040432), 2015-10-16
Supplement: microarrays-04-00432-s001.pdf [file microarrays-04-00432-s001.pdf]

## Supplementary Information

**Table S1.** Table of calculated test statistics and  $p$ -values from the Shapiro-Wilk test applied to each of the 48 initial arrays in the dataset used for the experiment.

| Array Number | Statistic | $p$ -Value |
|--------------|-----------|------------|
| 1            | 0.89      | 0.00       |
| 2            | 0.80      | 0.00       |
| 3            | 0.77      | 0.00       |
| 4            | 0.81      | 0.00       |
| 5            | 0.96      | 0.00       |
| 6            | 0.92      | 0.00       |
| 7            | 0.92      | 0.00       |
| 8            | 0.94      | 0.00       |
| 9            | 0.80      | 0.00       |
| 10           | 0.94      | 0.00       |
| 11           | 0.94      | 0.00       |
| 12           | 0.94      | 0.00       |
| 13           | 0.78      | 0.00       |
| 14           | 0.95      | 0.00       |
| 15           | 0.90      | 0.00       |
| 16           | 0.89      | 0.00       |
| 17           | 0.93      | 0.00       |
| 18           | 0.91      | 0.00       |
| 19           | 0.95      | 0.00       |
| 20           | 0.83      | 0.00       |
| 21           | 0.83      | 0.00       |
| 22           | 0.91      | 0.00       |
| 23           | 0.89      | 0.00       |
| 24           | 0.85      | 0.00       |
| 25           | 0.84      | 0.00       |
| 26           | 0.89      | 0.00       |
| 27           | 0.85      | 0.00       |
| 28           | 0.86      | 0.00       |
| 29           | 0.87      | 0.00       |
| 30           | 0.83      | 0.00       |
| 31           | 0.82      | 0.00       |
| 32           | 0.86      | 0.00       |
| 33           | 0.86      | 0.00       |
| 34           | 0.82      | 0.00       |
| 35           | 0.79      | 0.00       |
| 36           | 0.80      | 0.00       |
| 37           | 0.86      | 0.00       |
| 38           | 0.89      | 0.00       |
| 39           | 0.94      | 0.00       |
| 40           | 0.83      | 0.00       |
| 41           | 0.85      | 0.00       |
| 42           | 0.90      | 0.00       |
| 43           | 0.88      | 0.00       |

**Table S1.** *Cont.*

| Array Number | Statistic | <i>p</i> -Value |
|--------------|-----------|-----------------|
| 44           | 0.91      | 0.00            |
| 45           | 0.91      | 0.00            |
| 46           | 0.86      | 0.00            |
| 47           | 0.84      | 0.00            |
| 48           | 0.90      | 0.00            |

**Table S2.** Table of calculated test statistics and *p*-values from the Kolmogorov-Smirnov test applied to each of 48 pairs of an initial array and its inter-array technical replicate produced by Algorithm 1.

| Array Number | Statistic | <i>p</i> -Value |
|--------------|-----------|-----------------|
| 1            | 0.06      | 0.68            |
| 2            | 0.07      | 0.48            |
| 3            | 0.07      | 0.54            |
| 4            | 0.12      | 0.04            |
| 5            | 0.07      | 0.54            |
| 6            | 0.07      | 0.41            |
| 7            | 0.05      | 0.93            |
| 8            | 0.11      | 0.07            |
| 9            | 0.07      | 0.48            |
| 10           | 0.09      | 0.22            |
| 11           | 0.06      | 0.75            |
| 12           | 0.05      | 0.88            |
| 14           | 0.04      | 0.98            |
| 15           | 0.06      | 0.75            |
| 16           | 0.07      | 0.48            |
| 17           | 0.04      | 0.99            |
| 18           | 0.05      | 0.82            |
| 19           | 0.04      | 0.96            |
| 20           | 0.07      | 0.48            |
| 21           | 0.08      | 0.36            |
| 22           | 0.04      | 0.96            |
| 23           | 0.04      | 0.98            |
| 24           | 0.05      | 0.88            |
| 25           | 0.10      | 0.12            |
| 26           | 0.05      | 0.88            |
| 27           | 0.05      | 0.82            |
| 28           | 0.04      | 0.98            |
| 29           | 0.06      | 0.61            |
| 30           | 0.04      | 0.96            |
| 31           | 0.07      | 0.54            |
| 32           | 0.04      | 0.98            |
| 33           | 0.05      | 0.88            |
| 34           | 0.04      | 0.98            |
| 35           | 0.07      | 0.41            |

**Table S2.** *Cont.*

| <b>Array Number</b> | <b>Statistic</b> | <b><i>p</i>-Value</b> |
|---------------------|------------------|-----------------------|
| 36                  | 0.06             | 0.61                  |
| 37                  | 0.06             | 0.68                  |
| 38                  | 0.02             | 1.00                  |
| 39                  | 0.05             | 0.82                  |
| 40                  | 0.05             | 0.93                  |
| 41                  | 0.13             | 0.02                  |
| 42                  | 0.05             | 0.93                  |
| 43                  | 0.06             | 0.68                  |
| 44                  | 0.06             | 0.75                  |
| 45                  | 0.05             | 0.82                  |
| 46                  | 0.06             | 0.68                  |
| 47                  | 0.04             | 0.98                  |
| 48                  | 0.05             | 0.93                  |

**Table S3.** Table of calculated test statistics and *p*-values from the Kolmogorov-Smirnov test applied to each of 48 pairs of an initial array and its artificially phosphorylated inter-array technical replicate produced by Algorithm 2.

| <b>Array Number</b> | <b>Statistic</b> | <b><i>p</i>-Value</b> |
|---------------------|------------------|-----------------------|
| 1                   | 0.07             | 0.54                  |
| 2                   | 0.08             | 0.31                  |
| 3                   | 0.12             | 0.04                  |
| 4                   | 0.17             | 0.00                  |
| 5                   | 0.12             | 0.03                  |
| 6                   | 0.10             | 0.12                  |
| 7                   | 0.09             | 0.22                  |
| 8                   | 0.12             | 0.04                  |
| 9                   | 0.12             | 0.03                  |
| 10                  | 0.08             | 0.36                  |
| 11                  | 0.06             | 0.75                  |
| 12                  | 0.09             | 0.26                  |
| 13                  | 0.08             | 0.36                  |
| 14                  | 0.05             | 0.82                  |
| 15                  | 0.08             | 0.31                  |
| 16                  | 0.07             | 0.48                  |
| 17                  | 0.09             | 0.26                  |
| 18                  | 0.10             | 0.15                  |
| 19                  | 0.08             | 0.36                  |
| 20                  | 0.11             | 0.07                  |
| 21                  | 0.10             | 0.10                  |
| 22                  | 0.07             | 0.54                  |
| 23                  | 0.08             | 0.31                  |
| 24                  | 0.08             | 0.36                  |
| 25                  | 0.12             | 0.03                  |
| 26                  | 0.08             | 0.36                  |

Table S3. Cont.

| Array Number | Statistic | <i>p</i> -Value |
|--------------|-----------|-----------------|
| 27           | 0.08      | 0.31            |
| 28           | 0.07      | 0.41            |
| 29           | 0.06      | 0.61            |
| 30           | 0.08      | 0.31            |
| 31           | 0.08      | 0.36            |
| 32           | 0.06      | 0.75            |
| 33           | 0.07      | 0.41            |
| 34           | 0.07      | 0.54            |
| 35           | 0.10      | 0.15            |
| 36           | 0.10      | 0.15            |
| 37           | 0.09      | 0.18            |
| 38           | 0.04      | 0.98            |
| 39           | 0.04      | 0.98            |
| 40           | 0.09      | 0.26            |
| 41           | 0.15      | 0.00            |
| 42           | 0.07      | 0.48            |
| 43           | 0.10      | 0.10            |
| 44           | 0.06      | 0.61            |
| 45           | 0.07      | 0.54            |
| 46           | 0.07      | 0.41            |
| 47           | 0.07      | 0.54            |
| 48           | 0.09      | 0.22            |

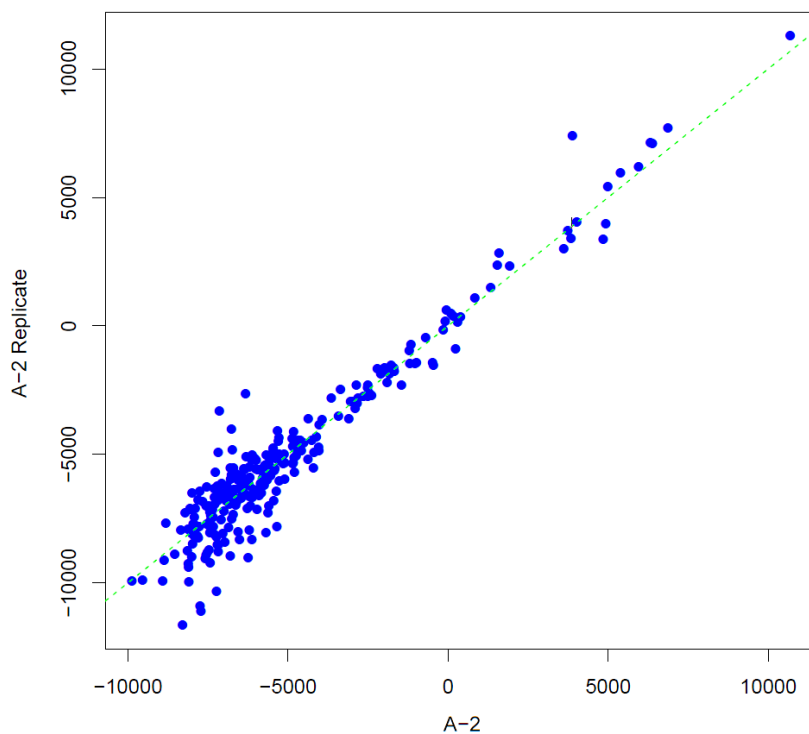

Figure S1. Scatter plot of background-corrected intensity values for an array and its synthesized inter-array replicate produced by Algorithm 1 with  $T=2$  starting with a template array “A-2”.

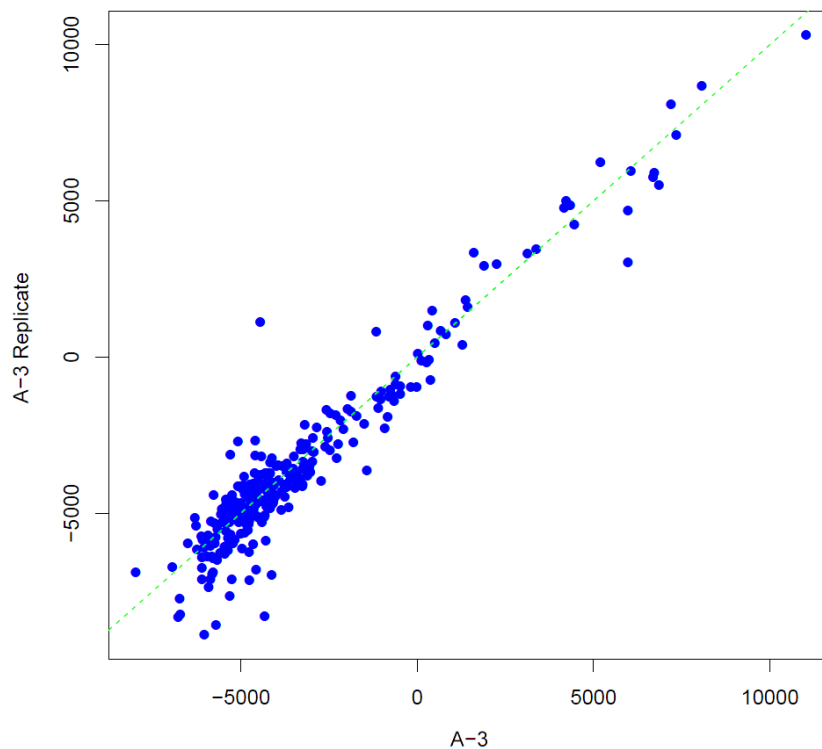

**Figure S2.** Scatter plot of background-corrected intensity values for an array and its synthesized inter-array replicate produced by Algorithm 1 with  $T = 2$  starting with a template array “A-3”.

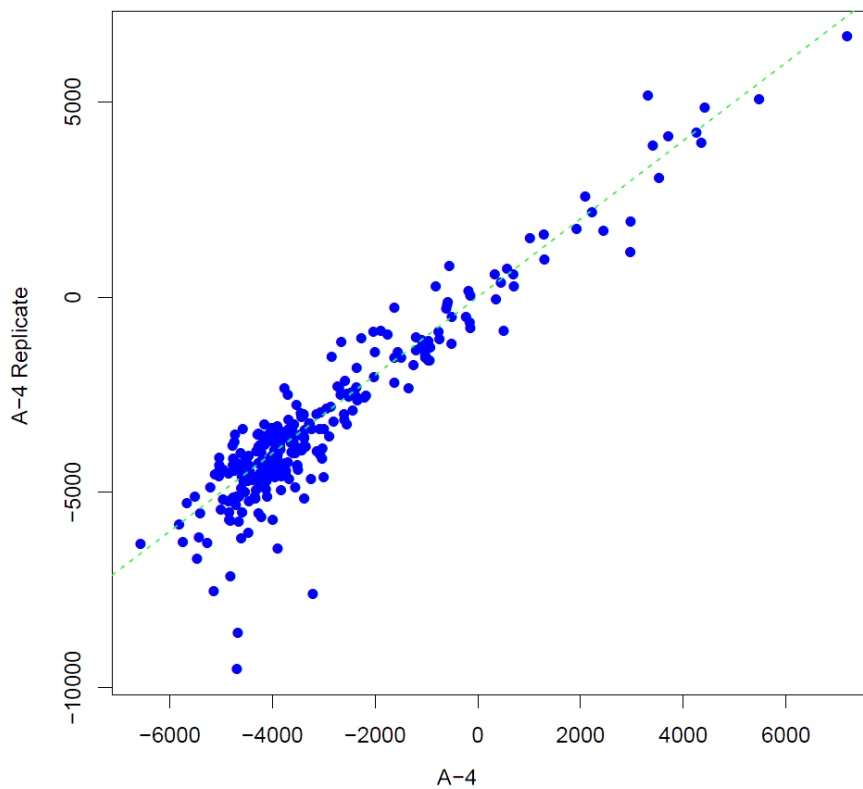

**Figure S3.** Scatter plot of background-corrected intensity values for an array and its synthesized inter-array replicate produced by Algorithm 1 with  $T = 2$  starting with a template array “A-4”.

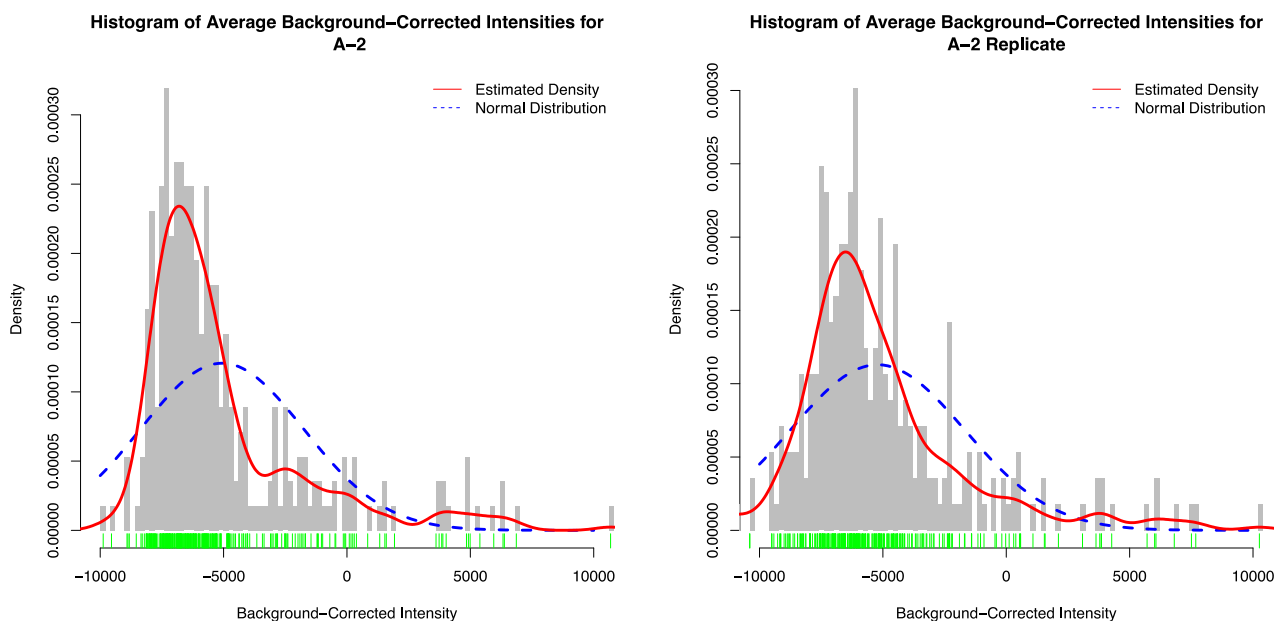

**Figure S4.** Histogram of background-corrected intensity values for the actual kinome array “A-2” (left), and its inter-array technical replicate (right). The green bars show a one-dimensional plot of background-corrected intensity values.

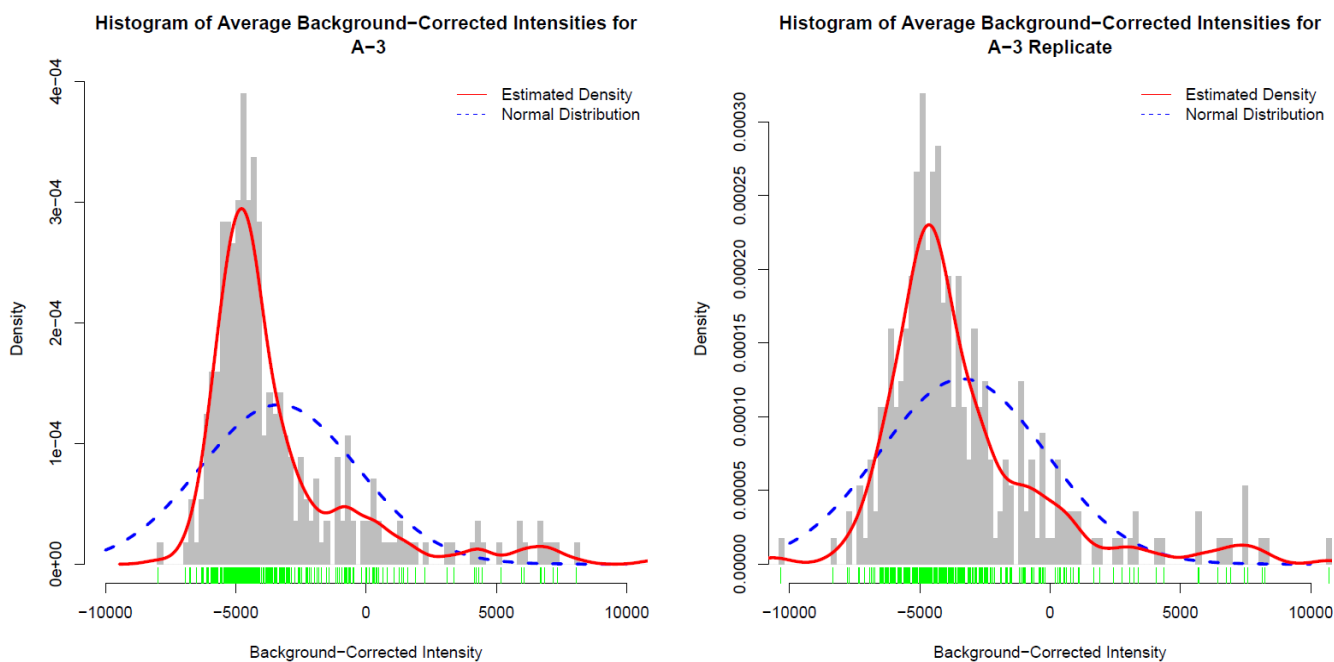

**Figure S5.** Histogram of background-corrected intensity values for the actual kinome array “A-3” (left), and its inter-array technical replicate (right). The green bars show a one-dimensional plot of background-corrected intensity values.

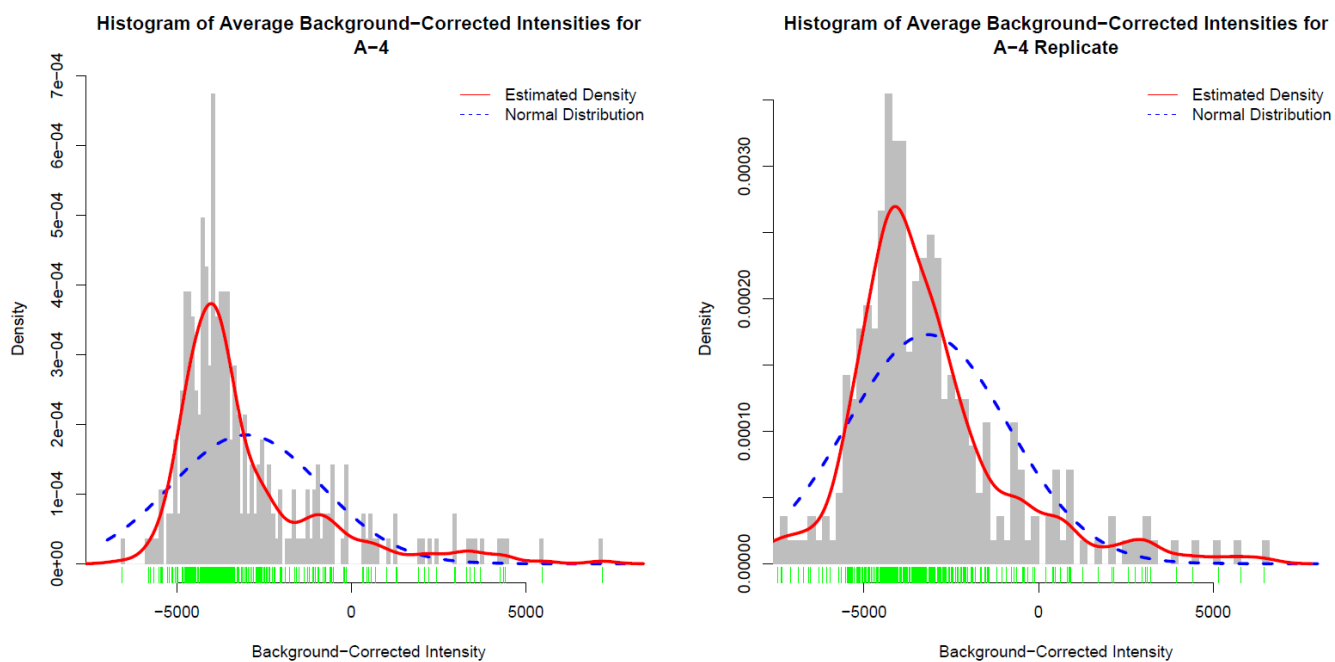

**Figure S6.** Histogram of background-corrected intensity values for the actual kinome array “A-4” (left), and its inter-array technical replicate (right). The green bars show a one-dimensional plot of background-corrected intensity values.

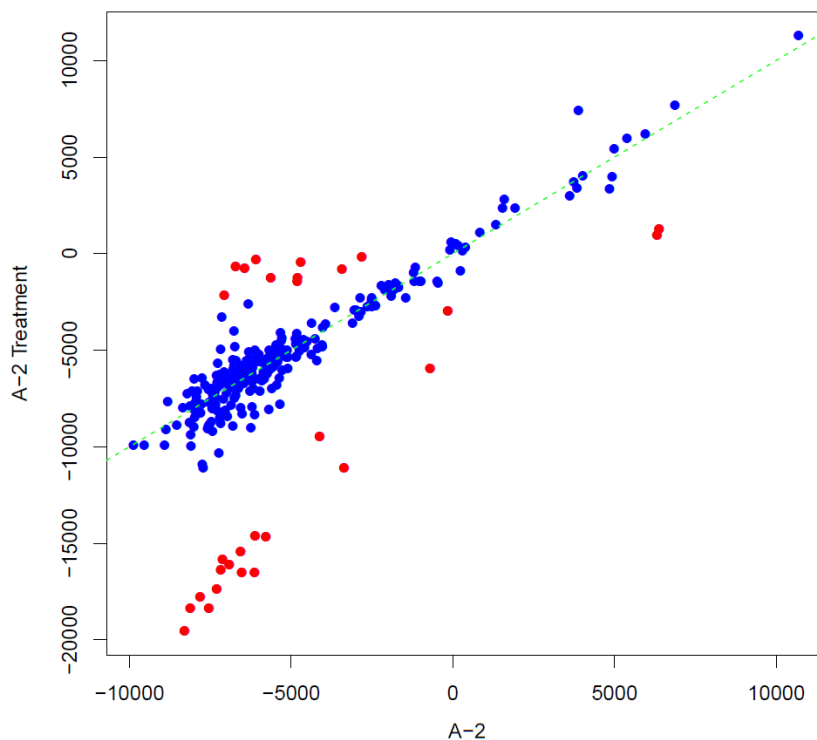

**Figure S7.** Scatter plot of background-corrected intensity values for an array and a phosphorylated version of its synthesized inter-array replicate when  $T = 2$  starting with a template array “A-2”. Differentially-phosphorylated peptides are depicted in red.

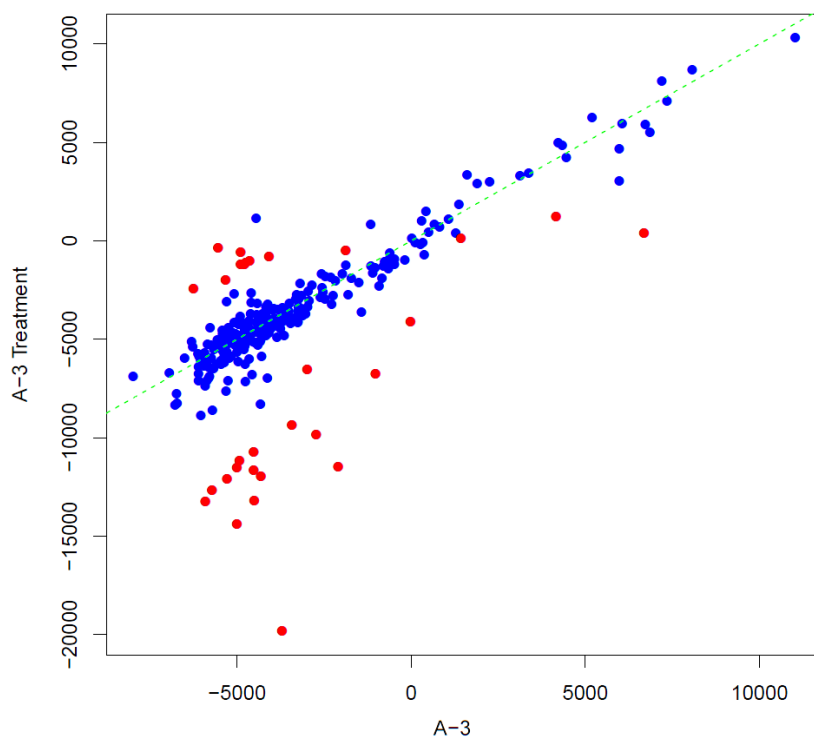

**Figure S7.** Scatter plot of background-corrected intensity values for an array and a phosphorylated version of its synthesized inter-array replicate when  $T = 2$  starting with a template array “A-3”. Differentially-phosphorylated peptides are depicted in red.

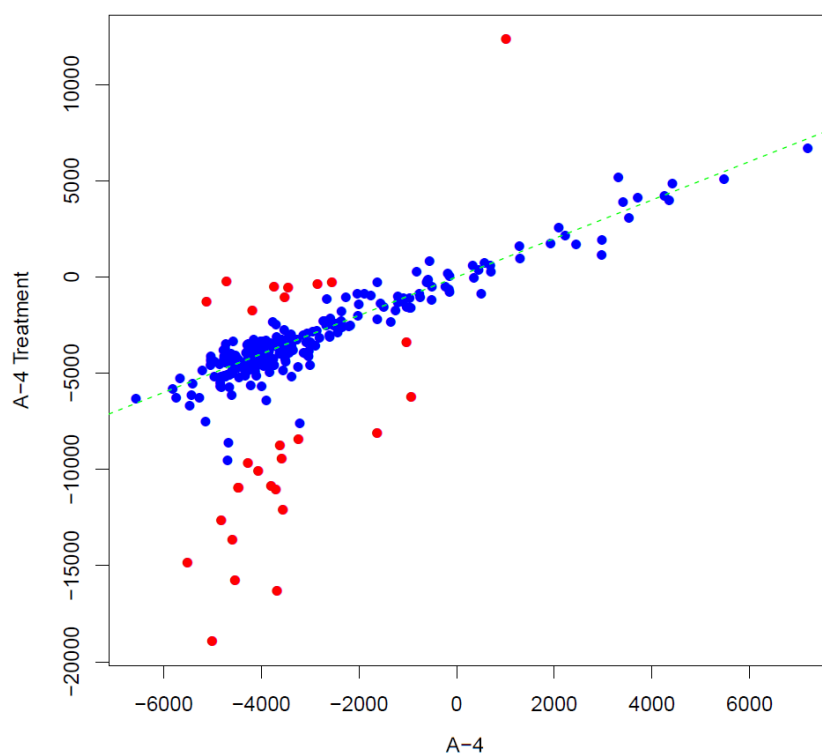

**Figure S8.** Scatter plot of background-corrected intensity values for an array and a phosphorylated version of its synthesized inter-array replicate when  $T = 2$  starting with a template array “A-4”. Differentially-phosphorylated peptides are depicted in red.
